# Supplementary material
Source: publisher figshare collection journal article supplement (https://acs.figshare.com/ndownloader/files/5127988)
Supplement: Supplementary file 1 [file 5127988]

## Supporting Information

Table 1S. Line Parameters for Kinetics Data

| Duplex                                   | Slope   | Y-intercept | R <sup>2</sup> |
|------------------------------------------|---------|-------------|----------------|
| Arrhenius Plots                          |         |             |                |
| (CAG):(GTC) <sub>4</sub>                 | -9.09e3 | 43.95       | 0.792          |
| (CAG):(GTC) <sub>10</sub>                | -11.3e3 | 49.37       | 0.927          |
| (CAG):(GTC) <sub>15</sub>                | -14.7e3 | 61.21       | 0.781          |
|                                          |         |             |                |
| (CCG):(GGC) <sub>4</sub>                 | -3.38e3 | 25.47       | 0.221          |
| (CCG):(GGC) <sub>10</sub>                | -4.99e3 | 29.80       | 0.691          |
| (CCG):(GGC) <sub>15</sub>                | -7.21e3 | 36.85       | 0.852          |
|                                          |         |             |                |
| Kinetic Dependence on [Na <sup>+</sup> ] |         |             |                |
| (CAG):(GTC) <sub>4</sub>                 | 2.48e6  | 5.54e6      | 0.774          |
| (CAG):(GTC) <sub>10</sub>                | 5.10e5  | 9.71e5      | 0.896          |
| (CAG):(GTC) <sub>15</sub>                | 1.06e6  | 1.91e6      | 0.859          |
|                                          |         |             |                |
| (CCG):(GGC) <sub>4</sub>                 | 2.66e6  | 2.66e6      | 0.404          |
| (CCG):(GGC) <sub>10</sub>                | 8.94e5  | 2.01e6      | 0.521          |
| (CCG):(GGC) <sub>15</sub>                | 1.34e6  | 2.74e6      | 0.661          |

Table 2S. Free energies of the hairpin to single strand transitions for individual oligonucleotides and for the duplex to single strand transitions for duplexes made from complementary oligonucleotides of the same length. Values for longer duplexes of [(CGG):(GCC)] are not included due to incomplete transitions (See reference 5).

| Oligomer                    | Length<br>(Nucleotides) | $\Delta G_{37C}$<br>(kcal/mol) |
|-----------------------------|-------------------------|--------------------------------|
| (CAG) <sub>4</sub>          | 12                      | 0.4 ± 0.02                     |
| (CAG) <sub>10</sub>         | 30                      | 3.4 ± 0.07                     |
| (CAG) <sub>15</sub>         | 45                      | 4.3 ± 0.2                      |
| (CTG) <sub>4</sub>          | 12                      | 0.0 ± 0.2                      |
| (CTG) <sub>10</sub>         | 30                      | 6.4 ± 0.3                      |
| (CTG) <sub>15</sub>         | 45                      | 10.9 ± 0.4                     |
| (CGG) <sub>4</sub>          | 12                      | 1.4 ± 0.07                     |
| (CGG) <sub>10</sub>         | 30                      | 11.9 ± 0.4                     |
| (CGG) <sub>15</sub>         | 45                      | 19.6 ± 0.8                     |
| (CCG) <sub>4</sub>          | 12                      | 0.2 ± 0.01                     |
| (CCG) <sub>10</sub>         | 30                      | 2.4 ± 0.1                      |
| (CCG) <sub>15</sub>         | 45                      | 3.5 ± 0.1                      |
| [(CAG):(GTC)] <sub>4</sub>  | 12                      | 4.0 ± 0.02                     |
| [(CAG):(GTC)] <sub>10</sub> | 30                      | 18.5 ± 0.7                     |
| [(CAG):(GTC)] <sub>15</sub> | 45                      | 31.5 ± 1.4                     |
| [(CGG):(GCC)] <sub>4</sub>  | 12                      | 6.2 ± 0.3                      |

**Figure 1S**

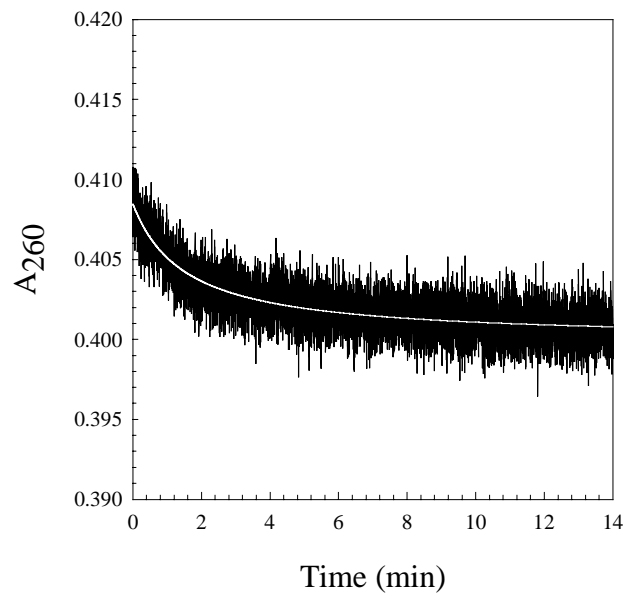

Figure 1S. Typical absorbance decay upon mixing an oligonucleotide hairpin with its complement of the same length. Data shown is for duplex formation of  $[(\text{CGG}):(\text{GCC})]_{10}$  at 37 °C. The raw data is shown in black and the best non linear fit for a second order reaction shown in white.
